# Supplementary material
Source: Springer Nature journal article supplement (https://www.springermedizin.de/resource/supplementary/12967_2013_1763_MOESM7_ESM.pdf/9575298)

# Chemotherapy

# Radiotherapy

# Immunotherapy

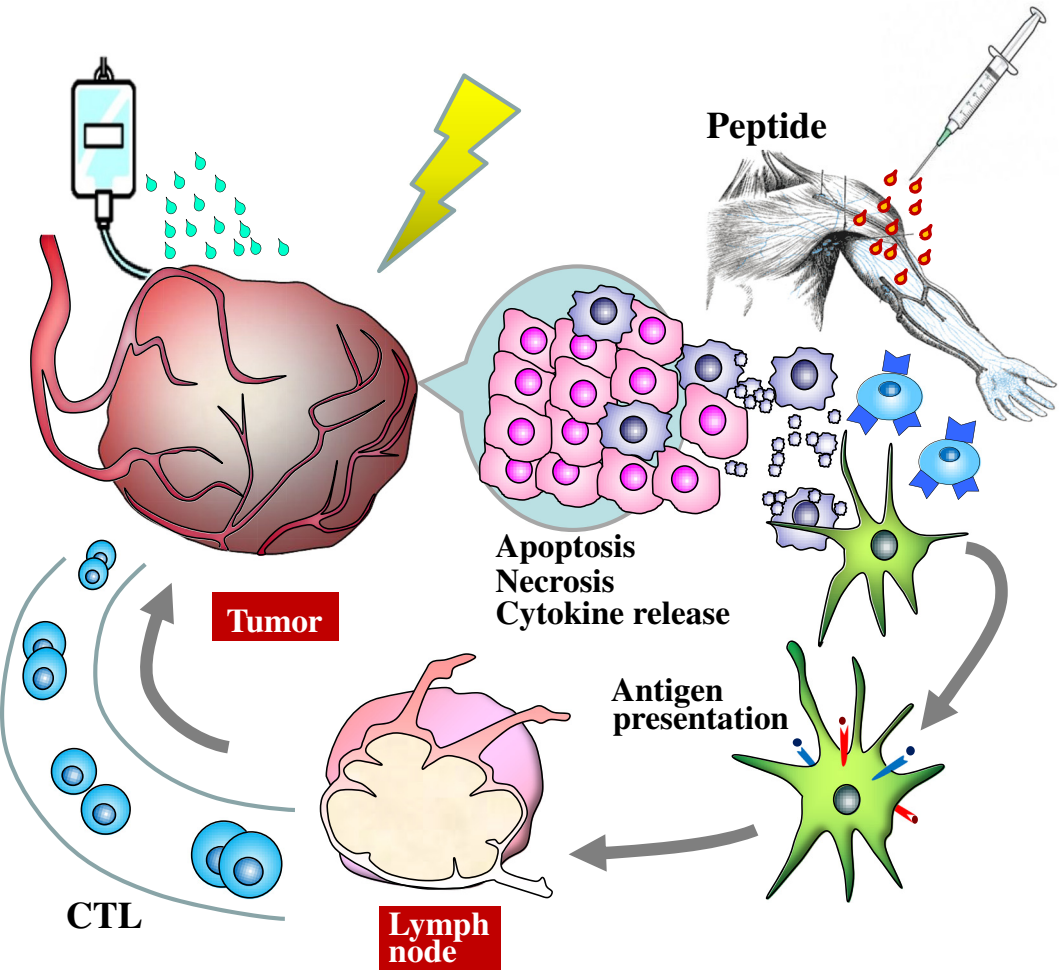

Supplement: MOESM7 [file 9575298]
